# Supplementary material for: p21Cip1 plays a critical role in the physiological adaptation to fasting through activation of PPARα
Source: PubMed Central journal article supplement (PMC5056372; doi:10.1038/srep34542), 2016-10-10
Supplement: srep34542-s1.pdf [file srep34542-s1.pdf]

# **p21<sup>Cip1</sup> plays a critical role in the physiological adaptation to fasting through activation of PPAR $\alpha$**

Elena Lopez-Guadamillas, Pablo J. Fernandez-Marcos,  
Cristina Pantoja, Maribel Muñoz-Martin, Dolores Martínez, Gonzalo Gómez-López,  
Ramón Campos-Olivas, Angela M. Valverde and Manuel Serrano

## **SUPPLEMENTARY INFORMATION**

### **INVENTORY**

**SUPPLEMENTARY FIGURES AND LEGENDS (Figure S1 – Figure S4)**

**SUPPLEMENTARY TABLES (Table S1 – Table S4)**

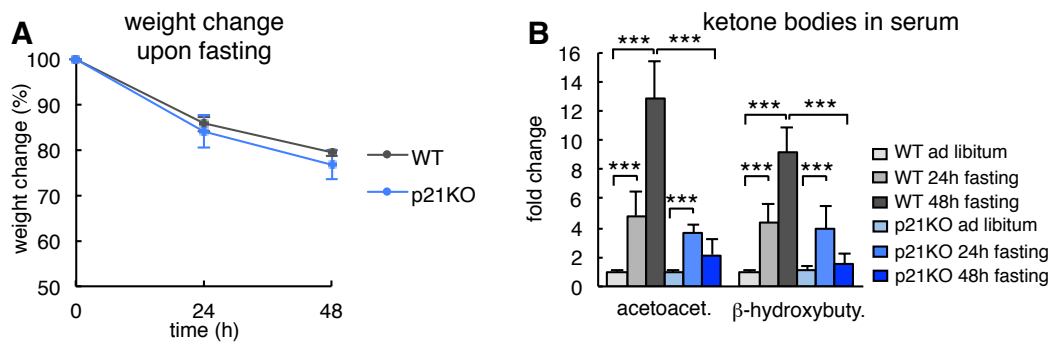

**Figure S1** (related to Figure 2)

- (A) Weight change of WT and p21KO mice after 24 and 48 h fasting (n=4 males, 12 weeks old).
- (B) Relative serum ketones bodies (acetoacetate and  $\beta$ -hydroxybutyrate) in ad libitum fed, 24 h or 48 h fasted WT and p21KO mice. Measurements were performed by NMR (n=4-5 males, 12 weeks old).

Values correspond to average  $\pm$  s.d. Statistical significance was determined by two-way ANOVA and Bonferroni post-hoc test: \*\*\*  $p < 0.001$ .

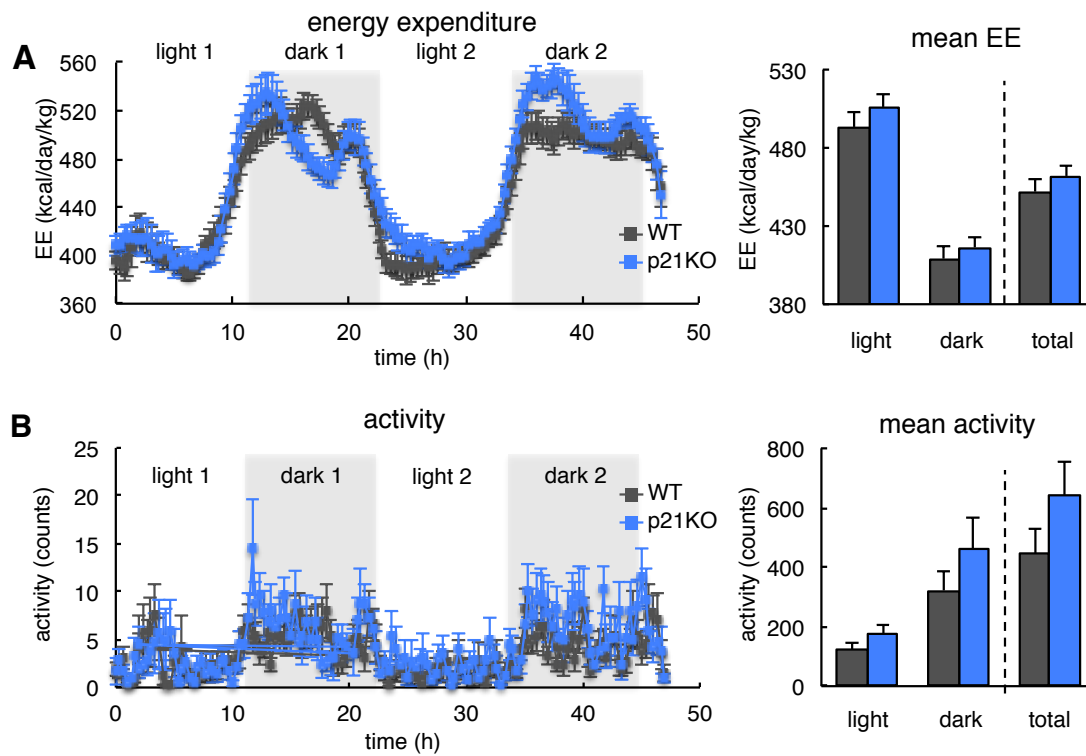

**Figure S2** (related to Figure 3)

(A) Left, energy expenditure (EE) of WT and p21KO mice during 48 h under standard feeding conditions. Right, mean EE of WT and p21KO mice at the indicated periods (n=8 male mice, 12 weeks old).

(B) Left, activity of WT and p21KO mice during 48 hours under standard feeding conditions. Right, mean activity of WT and p21KO at the indicated periods.

Values correspond to average  $\pm$  s.e.m.

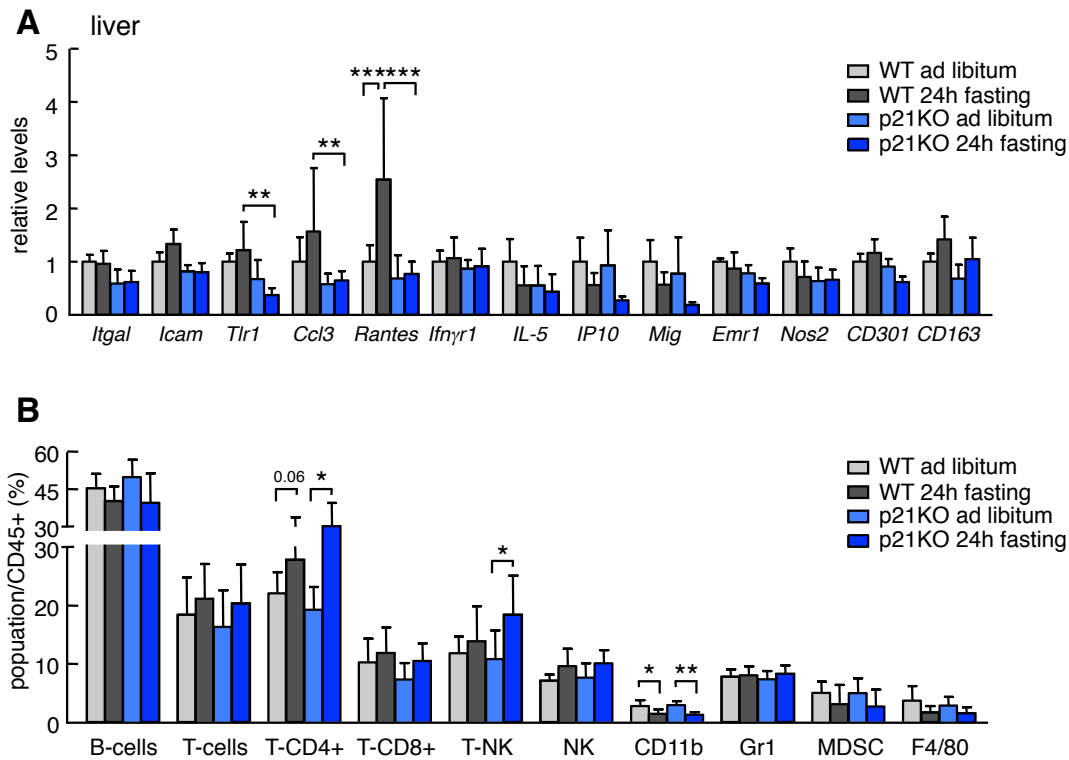

**Figure S3** (related to Figure 4)

- (A) Relative expression of the indicated genes related to inflammation in the liver of WT and p21KO mice under ad libitum feeding conditions or 24 h fasting (n=6, males, 12 weeks old). mRNA levels were normalized to  $\beta$ -actin.
- (B) Percentage of the indicated immune cell populations relative to CD45+ leukocytes, in the liver of ad libitum fed or 24 h fasted WT and p21KO mice (n=6 males, 12-16 weeks old).

Values correspond to average  $\pm$  s.d. Statistical significance was determined by two-way ANOVA and Bonferroni post-hoc test: \*p < 0.05, \*\*p<0.01, \*\*\* p<0.001.

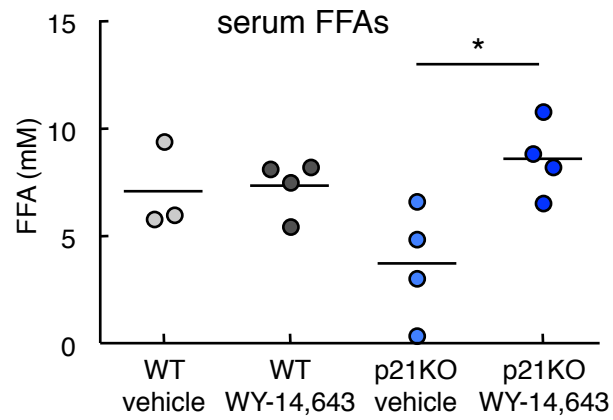

**Figure S4** (related to Figure 5)

Serum free fatty acids in WT and p21KO mice treated with vehicle or 75 mg/kg WY-14,643 by gavage (4 treatments, see Methods) during a period of 48 h fasting (n=3-4 per group, 14 weeks old male mice). Values correspond to average  $\pm$  s.d. Statistical significance was determined by two-way ANOVA and Bonferroni post-hoc test: \*p < 0.05.

## SUPPLEMENTARY TABLES

**Table S1: metabolites in serum**

|                       | WT             |                    | p21KO          |                           |
|-----------------------|----------------|--------------------|----------------|---------------------------|
|                       | ad libitum     | 48h fasting        | ad libitum     | 48h fasting               |
| temperature (°C)      | 36.15 ± 1.3    | 34.62 ± 1.2 *      | 36.0 ± 0.5     | 25.0 ± 1.0 ***<br>###     |
| glucose (mg/dl)       | 122.75 ± 14.27 | 43.0 ± 11.17 ***   | 135.8 ± 32.73  | 57.5 ± 11.38              |
| free fatty acids (nM) | 0.28 ± 0.05    | 1.20 ± 0.11 **     | 0.50 ± 0.17    | 0.23 ± 0.70 ###           |
| ketone bodies (μM /l) | 94.0 ± 8.9     | 1766.3 ± 110.3 *** | 130.6 ± 63.0   | 410.5 ± 283.7 ###         |
| triglycerides (mg/ml) | 0.35 ± 0.07    | 0.55 ± 0.30        | 0.34 ± 0.17    | 0.03 ± 0.05 *<br>###      |
| insulin (ng/ml)       | 0.78 ± 0.36    | 0.15 ± 0.07 ***    | 0.57 ± 0.12    | 0.10 ± 0.15 **            |
| IGF1 (ng/ml)          | 901.25 ± 47.25 | 504.06 ± 97.24 *   | 741.5 ± 103.30 | 26.25 ± 32.10 ***<br>###  |
| adiponectin (ng/ml)   | 83.39 ± 8.62   | 68.17 ± 11.25 **   | 94.22 ± 12.73  | 69.79 ± 21.31 *           |
| leptin (ng/ml)        | 4.46 ± 2.37    | 0.65 ± 0.34 ***    | 1.53 ± 0.79 ## | 0.13 ± 0.04 ***<br>##     |
| ALT (u/l)             | 26.55 ± 4.07   | 37.77 ± 3.99       | 33.85 ± 0.21   | 192.97 ± 14.26 ***<br>### |

\* Significant difference relative to ad libitum control (two-way ANOVA and Bonferroni post-hoc test): \*p < 0.05, \*\*p < 0.01, \*\*\*p < 0.001).

# Significant difference relative to WT control (two-way ANOVA and Bonferroni post-hoc test): #p < 0.05, ##p < 0.01, ###p < 0.001).

**Table S2: RNA-seq DEG data ( $q < 0.05$ )****UPREGULATED GENES IN p21KO**

| <b>p21KO ad lib vs. WT ad lib</b> | <b>p21KO vs. WT (both)</b> | <b>p21KO fast vs. WT fast</b> |
|-----------------------------------|----------------------------|-------------------------------|
| Arrdc3                            | 8430408G22Rik              | Lepr                          |
| Egr1                              | Glo1                       | Cyp2b10                       |
| Mup17                             | Igfbp2                     | Pdk4                          |
| Zbtb16                            | Rgs16                      | Acmsd                         |
| Dynlt1c,Dynlt1f                   | Pla2g12a                   | Cbs                           |
| Efna1                             | Agxt2l1                    | Hamp2                         |
| Dynlt1b                           | Cobll1                     | Adcy1                         |
| Junb                              | Wnk4                       | Ppp1r3g                       |
| Dynlt1a                           |                            | Cyp17a1                       |
| Spry4                             |                            | St5                           |
| Nr0b2                             |                            | Hamp                          |
| Eno1,Gm5506                       |                            | Hspb1                         |
| Bcl6                              |                            | Mt1                           |
| Pim1                              |                            | Mt2                           |
| Syvn1                             |                            | 3930402G23Rik                 |
| Hsd17b6                           |                            | Cend1                         |
| Il6ra                             |                            | Ddit4                         |
| Nfxl1                             |                            | Rab44                         |
| Mup5                              |                            | Hba-a2                        |
| Rnft2                             |                            | Txnip                         |
| Il1r1                             |                            | Arl4a                         |
| Rnf39                             |                            | Atf5                          |
| Zkscan1                           |                            | Reps1                         |
| Dnajb9                            |                            | B930025P03Rik                 |
| Acsm3                             |                            | Sulf2                         |
| Nr1d1                             |                            | Krt23                         |
| Mup6                              |                            | Serpine2                      |
| Zfp36                             |                            | Igfbp1                        |
| Tgif1                             |                            | Cpt1b                         |
| Pcbp2                             |                            | Sdsl                          |
| Tmem39a                           |                            | Dnajb2                        |
| Selenbp2                          |                            | Il1rn                         |
| Osgin1                            |                            | Kif21a                        |
| Pim3                              |                            | Sik1                          |
| Zfp862                            |                            | Fam134b                       |
| Gdf15                             |                            | Fgf21                         |
| Aadat                             |                            | Rnf167                        |
| Clec2h                            |                            | Plin5                         |
| Mtss1                             |                            | Chkb                          |
| Fzd8                              |                            | Ablim3                        |
| Enpp2                             |                            | Camk2b                        |
| Slc13a2                           |                            | Scara5                        |
| Atp6v0c                           |                            | 1700017B05Rik                 |
| Sfpq                              |                            | 4930452B06Rik                 |
| Arhgef26                          |                            | E030018B13Rik                 |
| Nox4                              |                            | Tacc2                         |
| Creb3l2                           |                            | Slc41a3                       |

Gigyf2  
Golp3l  
Ppp2r5e  
Pabpc4  
4933426M11Rik  
Gfpt1  
Irs2  
G0s2  
Xlr3a  
Fam193b  
Arhgap32  
Mup9  
Hbb-b1,Hbb-b2  
Lifr  
Herpud1  
Trib3  
Cela1  
Cdk13  
Ces2c  
Slc25a34  
Map3k5  
Eif2ak3  
Ep400  
Synj2  
Cyp2u1  
Anks1  
Xlr3b  
Ehmt1  
Nfix  
Dsg1c  
Ppargc1b  
Whsc1l1  
Ass1  
Hyou1  
Fzd5  
Myo1e  
Sun2  
Trib1  
Cys1  
Rhobtb1  
Ppp1r3c  
Fam107b  
Cpeb2

Arntl  
Accn5  
Trp53inp1  
Cyp2b13  
Josd2  
Maff  
Hilpda  
Dusp8  
Ppargc1a  
Nrg4  
Map3k6  
Parp16  
Lpin2  
Rabggtb  
Slc16a10  
Rab30  
Arhgef40  
Arl15  
Sorbs3  
Cdc42ep5  
Aldoa  
Tubb2b  
Srrm4  
Fbxo6  
Myom1  
Derl3  
Grtp1  
Cyp39a1  
Tbc1d8  
Abtb2  
Rbpms  
Fbxo31  
Peg3  
Nnmt  
Lman2l  
Eif4ebp3  
Clpx  
Nedd4l  
Slc20a1  
Sf1  
Rhbdd2  
Tubb2a  
Cgref1  
Echdc2  
Cep110  
BC057022  
Cdkn1a  
Slc25a33  
Acacb  
Lepre1  
Mcc  
Pde4c  
Peg3as



Creld2  
 Atoh8  
 Zfhx2  
 Tnfrsf12a  
 Rps4y2  
 Chpf  
 Paip1  
 Il3ra  
 Tnk2  
 Pogk  
 Vopp1  
 Atf3  
 Kctd15  
 Ccnf  
 Gadd45b  
 Eppk1  
 Elmod3  
 2010003K11Rik  
 Nr4a1  
 P4ha2

#### DOWNREGULATED GENES IN p21KO

| p21KO ad lib vs. WT ad lib | p21KO vs. WT (both) | p21KO fast vs. WT fast |
|----------------------------|---------------------|------------------------|
| Fgl1                       | Apcs                | Irf7                   |
| Gadd45g                    | Lcn2                | Socs2                  |
| Mfsd2a                     | Orm2                | Acot3                  |
| Mt1                        | Saa1                | Stat1                  |
| Mt2                        | Saa2                | Spp1                   |
| Myc                        | Saa3                | H2-Aa                  |
| Ppp1r10                    | Tiam2               | Itih4                  |
| Hcn3                       | Apol9a              | Ndrp2                  |
| Cabyr                      | Trim30d             | Ifi2711                |
| Apoa4                      | Pfkfb3              | Entpd5                 |
| Mvd                        | Igtp                | Sorbs2                 |
| Lrg1                       | Ly6e                | H2-Eb1                 |
| Fbf1                       | Tymp                | 9030619P08Rik          |
| Fdps                       | Tgtp1               | Lyz2                   |
| Mid1ip1                    | Tff3                | H2-Ab1                 |
| Orm3                       | Samd9l              | Col3a1                 |
| 1810011O10Rik              | Cish                | Apol7a                 |
| Slc3a1                     | Ifi44               | Clec7a                 |
| Cyp4a14                    | Marco               | Chpt1                  |
| Acacb                      | Gbp6                | Cd5l                   |
| Pmvk                       | Tgtp2               | Tbc1d24                |
| Ppp1r3b                    | Ifit1               | Ly6d                   |
| Acsl3                      | Ifi2712b            | Slc44a3                |
| Nedd9                      | Gbp10               | Cd24a                  |
| Apol9b                     | Thrsp               | Arhgap19               |
| Gm5506                     | Gm4070              | Rbfox2                 |
| Serpina4-ps1               | Axl                 | Emr1                   |

|               |          |               |
|---------------|----------|---------------|
| Usp18         | Cd36     | Abcd2         |
| Ucp2          | Mpeg1    | Cybb          |
| Prepl         | Pklr     | Lgals1        |
| Nnmt          | Rtn4     | Acly          |
| Prg4          | Tmem176a | Cd97          |
| Tmem176b      | Prlr     | Arhgef9       |
| Chrna4        | Col15a1  | ligp1         |
| Dnajb2        | Tifa     | Vcam1         |
| Tmem51        | Wdfy1    | Samhd1        |
| Pcsk9         | Zbp1     | Tlr12         |
| H2-T9         | Mmp19    | Paqr9         |
| Fads3         | Lrtm1    | Ces2c         |
| Hmgcs1        | Mmd2     | 1110020G09Rik |
| Steap4        | Ttc23    | Lyz1          |
| Orm1          | Psemb9   | Klhdc7a       |
| Tap1          | Gbp3     | Ubp1          |
| Hmgcr         | Erdr1    | Slc39a4       |
| Atp11a        | Wsb1     | Zfp207        |
| Hbb-b2        | Gm4841   | Arap1         |
| Aacs          | Aqp8     | Oxr1          |
| 2010003K11Rik | Trim30a  | Osbpl3        |
| Extl1         | Psemb8   | Uap111        |
| Fam65b        | lfi47    | Olfml1        |
| Smpd3         | ltgal    | Col1a1        |
| Gm8801        | Il18bp   | Siglec1       |
| Rgs3          | Gbp7     | Immt          |
| Shisa5        | Parp14   | Alas2         |
| Eif4e3        | Hacl1    | Slc41a2       |
| Oasl1         | Slc13a5  | Ptprc         |
| Sqle          | Slc13a3  | Lima1         |
| Tgm1          | Fam198a  | Lilrb4        |
| Gpr110        | Oas1a    | Gbp2          |
| Trafd1        | Gm12250  | Aoah          |
| Fgfr3         | Sirpa    | Flnb          |
| Pml           | Fam46a   | Keg1          |
| Lbp           | Gas6     | Cd52          |
| Gm14403       | Irgm2    | Cxcl12        |
| Lss           | Dmpk     | Nckap1l       |
| Sco2          | Trim12c  | Tmsb4x        |
| Cdhr5         | St6gal1  | Myof          |
| Cyp26a1       | C1qc     | Sdc3          |
| Tmie          | Gstt3    | Gigyf2        |
| Fdft1         | Pls1     | Ncald         |
| Unkl          | AW112010 | Ccl5          |
| Ifit3         | Csf1r    | Scd4          |
| Adar          | Ctss     | Cxcl13        |
| Acnat2        | C1qa     | Pik3r1        |
| Rasgef1b      | Irgm1    | Ubd           |
| Dhx58         | Tspan4   | Ptprg         |
| Cd151         | Cxcl9    | Lrit1         |
| Srxn1         | Robo1    | Il2rg         |
| Tcirg1        | Pla2g7   | AF251705      |
| Jak3          | Rtp4     | Scd2          |

Serpina7  
Ccrn4l  
S100a10  
Gm7120  
Isg15  
Trim34a  
Cebpe  
Fasn  
Gstm4  
Hn1l  
Aldh1b1  
Acss2  
1300015D01Rik  
Gm16551  
G6pc  
Fam53b  
Mtmr11  
Slc16a5  
Spsb3  
Hspb1  
Pnpla3  
Ddc  
Rxrg  
C1qtnf1  
Irf9  
Pgd  
Bud13  
Gck  
Tagap1  
Mkl1  
Tubb2a  
Naip2  
Pltp  
Serinc2  
Ildr2  
Josd2  
Tor1aip2  
Ddx60  
Insc  
Rap1gap  
Isyna1  
Hsp90aa1  
Slc37a1  
Zc3hav1  
Gtpbp2  
Tceal8  
Sc4mol  
Tnfsf10  
Tgfbr2  
Clstn3  
Csrp3  
Gm19619  
Pvrl2

Gsdmd  
A230050P20Rik  
Tnfrsf19  
Kifc3  
Gm8979  
Cd74  
Wwtr1  
Fam84b

Ank3  
Arhgap25  
Rbm3  
Ces1g  
Scara3  
Ghr  
Vwa5a  
Slc7a8  
Cib3  
Ces2d-ps  
Cyp2a4  
Rps6ka1  
Nat8  
E330011O21Rik  
Rasa4  
Klf13  
Lyn  
Ccr5  
Scd3  
Sorbs1  
Ugt1a9  
Clec4a3  
Ociad2  
Nr3c2  
Adcy7  
Irf8  
Erbp2ip  
Rnf152  
Clec12a  
Aif1  
Tlr13  
Stk10  
Ces2e  
Nnt  
Lgals3  
Cyp3a25  
C1qb  
Rcbtb2  
Zfp809  
Lpcat2  
Cml5  
AI182371  
Gbp9  
Myo1f  
Abcg3  
Nr1h4  
Pld4  
Lphn2  
Fyb  
Phldb2  
Iqgap1  
Fam55b  
B3galt1

Dock9  
Srp54b,Srp54c  
Bst2  
Znrf1  
Gm7694  
Mdp1  
Fam47e  
Pdzk1ip1  
Mcm6  
Gnat1  
Gtf2ird1  
St6galnac6  
D14Ertd449e  
Serpina11  
Ctgf  
Nlrc5  
Sgsm1  
Fam25c  
Ube2h  
Herc6  
Mvk  
Got1  
Fam129b  
Ifitm2  
Zbtb4  
Lgals3bp  
Nrp2  
Aig1  
Dhcr7  
I830012O16Rik  
Steap2  
Cyp4a10  
Sun1  
St5  
Cpne8  
Tmem98  
Zfp259  
Trim21  
Plac8  
Oasl2  
Gm  
Jub  
Rras  
Xaf1  
Nsdhl  
Slc25a25  
Trim12a  
Cyb561  
1700024P16Rik  
Agpat9  
Filip11  
Mtap7d1  
Sall2

Tstd1  
Csf1  
Cyp2c50  
Dcun1d1  
Cd68  
Klra2  
Ahnak  
Gda  
Gbp8  
Lair1  
Hpgds  
Acbd5  
Fgd2  
Cenpl  
Arhgap30  
Acot4  
Rasal2  
Lpl  
Coro1a  
Gbp1  
Igfals  
Pnlcd1  
Eif4g3  
Hck  
Gbp11  
Blnk  
Capg  
Cyp2a5  
Hk3  
Lgmn  
Taok3  
Rdh9  
Cldn2  
Slc15a3  
Tfrc  
Ly86  
Hnmt  
Gp49a  
Cxcl16  
Tyrobp  
BC013712  
Fam129a  
Laptm5  
Anxa2  
Dut  
C730036E19Rik  
Syk  
Unc119  
Adhfe1  
Cd48  
Lilrb3  
Slc2a9  
Cd180

Cyp17a1  
Oas1g  
Sfxn5  
Arhgef19  
Gm14431  
Ifitm3  
Mfge8  
Tap2  
Ggt6  
Elovl6  
Gpc1  
Cldn14  
Golm1  
Htatip2  
Tm6sf2  
AB124611  
Ddhd1  
Slc17a1  
Fam73b  
Hba-a1,Hba-a2  
Srp54a  
Cmpk2  
Gm5480  
D730039F16Rik  
Alas1  
Elovl5  
Abtb2  
Ppap2c  
Ppl  
Ang  
Litaf

Lsp1  
Cbr1  
Rgn  
Itgb2  
Adam33  
Phka2  
Ptprd  
Timd4  
Gstm3  
Gm8989  
Adra1b  
Fabp5  
B430306N03Rik  
Herc3  
Efha1  
Pira2  
Gm4951  
Idi1  
Parp12  
S100a11  
Magi1  
Mpp1  
Trim24  
Hmox1  
Mapkapk3  
Lrrc25  
Tmtc4  
Aifm3  
Gng2  
Evi2b  
Mthfd1l  
Mmp15  
Clec4a1  
1600014C10Rik  
Clec4n  
Folr2  
Aatk  
Abr  
Marcks  
Gna14  
Hipk2  
Mta3  
Cxcl10  
Scd1  
Ctla2b  
Nfib  
Vsig4  
Cd276  
Cyp3a16

**Table S3: RNA-seq GSEA data**

downregulated in  
p21KO ad libitum vs. wt ad libitum

| KEGG gene set                             | FDR   |
|-------------------------------------------|-------|
| biosynthesis of steroids                  | 0.001 |
| antigen processing and presentation       | 0.010 |
| proteasome                                | 0.032 |
| glycolysis/gluconeogenesis                | 0.062 |
| pentose phosphate pathway                 | 0.106 |
| cell adhesion molecules                   | 0.130 |
| galactose metabolism                      | 0.147 |
| natural killer cell mediated cytotoxicity | 0.203 |
| tyrosine metabolism                       | 0.204 |
| adipocytokine signaling pathway           | 0.214 |
| glycan structures-degradation             | 0.216 |
| primary immunodeficiency                  | 0.218 |
| DNA replication                           | 0.231 |
| autoimmune thyroid disease                | 0.234 |

downregulated in  
p21KO 24h fasting vs. wt 24h fasting

| KEGG gene set                                | FDR   |
|----------------------------------------------|-------|
| natural killer cell mediated cytotoxicity    | 0.002 |
| ECM-receptor interaction                     | 0.009 |
| leucocyte transendothelial migration         | 0.009 |
| drug metabolism-other enzymes                | 0.009 |
| type II diabetes mellitus                    | 0.012 |
| B-cell receptor signaling pathway            | 0.012 |
| toll-like receptor signaling pathway         | 0.012 |
| focal adhesion                               | 0.017 |
| cell adhesion molecules                      | 0.022 |
| butanoate metabolism                         | 0.028 |
| T-cell receptor signaling pathway            | 0.039 |
| fc epsilon ri signaling pathway              | 0.058 |
| pentose and glucuronate interconversions     | 0.061 |
| primary immunodeficiency                     | 0.068 |
| androgen and estrogen metabolism             | 0.070 |
| apoptosis                                    | 0.088 |
| porphyrin and chlorophyll metabolism         | 0.089 |
| complement and coagulation cascades          | 0.090 |
| regulation of actin cytoskeleton             | 0.092 |
| biosynthesis of steroids                     | 0.092 |
| hematopoietic cell lineage                   | 0.093 |
| pancreatic cancer                            | 0.093 |
| PPAR signaling pathway                       | 0.094 |
| phosphatidylinositol signaling system        | 0.099 |
| adherens junction                            | 0.101 |
| bile acid biosynthesis                       | 0.104 |
| antigen processing and presentation          | 0.108 |
| colorectal cancer                            | 0.114 |
| small cell lung cancer                       | 0.114 |
| gamma hexachlorocyclohexane degradation      | 0.117 |
| dentatorubropallidoluysian atrophy           | 0.119 |
| mismatch repair                              | 0.120 |
| drug metabolism-cytochrome P450              | 0.121 |
| drug metabolism-cytochrome P450              | 0.121 |
| DNA replication                              | 0.123 |
| cytokine-cytokine receptor interaction       | 0.148 |
| biosynthesis of unsaturated fatty acids      | 0.161 |
| non-small cell lung cancer                   | 0.171 |
| graft-versus-host disease                    | 0.176 |
| glycosphingolipid biosynthesis               | 0.179 |
| ABC transporters                             | 0.180 |
| metabolism of xenobiotics by cytochrome P450 | 0.189 |

**Table S4: qRT-PCR primers**

PCR primers for mouse transcripts

| Primer                     | Forward sequence 5' → 3' | Reverse sequence 5' → 3' |
|----------------------------|--------------------------|--------------------------|
| <i>β-Actin</i>             | GGCACCACACCTTCTACAATG    | GTGGTGGTGAAGCTGTAGCC     |
| <i>Gapdh</i>               | TTCACCACCATGGAGAAGGC     | CCCTTTTGGCTCCACCCT       |
| <i>Emr1</i>                | TGACTCACCTTGTGGTCCTAA    | CTTCCCAGAATCCAGTCTTTCC   |
| <i>G6pc</i>                | ACTGTGGGCATCAATCTCCT     | AGGTGACAGGGAAGTGTCTT     |
| <i>Pgc1a</i>               | GGGTTATCTTGGTTGGCTTTATG  | AAGTGTGGAAGTCTCTGGAAGT   |
| <i>p21<sup>Cip1</sup></i>  | GTGGGTCTGACTCCAGCCC      | CCTTCTCGTGAGACGCTTAC     |
| <i>p16<sup>Ink4a</sup></i> | TACCCCGATTCAGGTGAT       | TTGAGCAGAAGAGCTGCTACGT   |
| <i>p19<sup>ARF</sup></i>   | GCCGCACCGGAATCCT         | TTGAGCAGAAGAGCTGCTACGT   |
| <i>p27<sup>Kip1</sup></i>  | TCAAACGTGAGAGTGTCTAACG   | CCGGGCCGAAGAGATTTCTG     |
| <i>p53</i>                 | GCGTAAACGCTTCGAGATGTT    | TTTTTATGGCGGGAAGTAGACTG  |
| <i>Fgf21</i>               | GTGTCAAAGCCTCTAGGTTTCTT  | GGTACACATTGTAACCGTCCTC   |
| <i>CD36</i>                | ATGGGCTGTGATCGGAAGT      | TTTGCCACGTCATCTGGGTTT    |
| <i>Abcd2</i>               | TGTGGAGCAGCTGTGGACTA     | ATCAGCTCCAGAGGCCAGTA     |
| <i>Saa3</i>                | TAAAGTCATCAGCGATGCCAGAG  | CAACCCAGTAGTTGCTCCTCTTC  |
| <i>Acacb</i>               | GTATCCGCAAGGCTGAGAGT     | GTTCTGGGCCAGCTTCATTA     |
| <i>Gyk</i>                 | TGAAGAAAGCGAAATCCGTTACT  | CCCAAAGGCAGACTACAGAAG    |
| <i>Acot1</i>               | TGCACGAGCGTCACTTCTT      | GATACTCCAGAAGGCCACCTC    |
| <i>Acot3</i>               | GCACGAGCGTCACTTCAT       | CGATACTCCAGAAGGCCACT     |
| <i>Hmox1</i>               | AACACTCTGGAGATGACACCT    | TGTGAGGGATCTGGTCTTTG     |
| <i>Itgal</i>               | CCAGACTTTTGCTACTGGGAC    | GCTTGTTCCGGCAGTGATAGAG   |
| <i>Icam</i>                | TCCGCTACCATCACCGTGTAT    | TAGCCAGCACCGTGAATGTG     |
| <i>Tlr1</i>                | TGTGAATGCAGTTGGTGAAGA    | CATTCCTGAGGTCCCTGCTA     |
| <i>Ccl3</i>                | CTCCAGCCAGGTGTCATTTT     | CTTGGACCCAGGTCTCTTTGG    |
| <i>Rantes</i>              | GCTGCTTTGCCTACCTCTCC     | TCGAGTGACAAACACGACTGC    |
| <i>Ifngr1</i>              | GTGGAGCTTTGACGAGCACT     | TTCCAGCATACGACAGGGT      |
| <i>IL-5</i>                | CTCTGTTGACAAGCAATGAGACG  | TCTTCAGTATGTCTAGCCCCTG   |
| <i>IP10</i>                | CCAAGTGCTGCCGTCATTTTC    | GGCTCGCAGGGATGATTTCAA    |
| <i>Mig</i>                 | GGAGTTCGAGGAACCCTAGTG    | GGGATTTGTAGTGGATCGTGC    |
| <i>Nos2</i>                | AATCTTGGAGCGAGTTGTGG     | CAGGAAGTAGGTGAGGGCTTG    |
| <i>CD301</i>               | TGAGAAAGGCTTTAAGAACTGGG  | GACCACCTGTAGTGATGTGGG    |
| <i>CD163</i>               | TCCACACGTCCAGAACAGTC     | CCTTGAAACAGAGACAGGC      |
| <i>Atrogin</i>             | ATGCACACTGGTGCAGAGAG     | TGTAAGCACACAGGCAGGTC     |
| <i>Murf</i>                | CCACCAAACCTTGTGGAGACC    | CATGTTCTCAAAGCCTTGCTC    |
| <i>Atf4</i>                | CTGGATTCGAGGAATGTGCT     | CCACCATGGCGTATTAGAGG     |

PCR primers for human transcripts

| Primer                    | Forward sequence 5' → 3' | Reverse sequence 5' → 3' |
|---------------------------|--------------------------|--------------------------|
| <i>β-Actin</i>            | CAAGGCCAACCGCGAGAAGAT    | CCAGAGGCGTACAGGGATAGCAC  |
| <i>p21<sup>Cip1</sup></i> | TGTCCGTCAGAACCCATG       | TGCCTCCTCCCAACTCATC      |
